# Supplementary material for: Transcriptome and miRNome Analysis Provide New Insight Into Host Lipid Accumulation, Innate Immunity, and Viral Persistence in Hepatitis C Virus Infection in vitro
Source: Front Microbiol. 2020 Sep 30;11:535673. doi: 10.3389/fmicb.2020.535673 (PMC7555709; doi:10.3389/fmicb.2020.535673)
Supplement: Supplementary Table 5 — The differentially expressed (DE) host factors in HCV-infected Huh7 cells at 12, 36, and 60 h. [file Table_5.XLS]

## Sheet: DE HFs at 12 h,36 h and 60 h
Supplementary Table S5. The differentially expressed (DE) host factors in HCV-infected Huh7 cells at 12, 36 and 60 h
The differentially expressed host factors at 12 h
	log2FC	FDR	Gene symbol	Function	Relavant HCV Life Cycle Stages	Abbreviation	References
ENSG00000169174	-0.66	0.00041425	PCSK9	HAF	Entry	E	Li et at., 2014, Table S9
ENSG00000137834	-0.63	0.00121552	SMAD6	HPF	Entry; IRES-mediated Translation	M	Li et at., 2014, Table S8
The differentially expressed host factors at 36 h
	log2FC	FDR	Gene symbol	Function	Relavant HCV Life Cycle Stages	Abbreviation	References	Regulatory mode
ENSG00000115884	-0.65	1.51e-27	SDC1	HPF	Attachment	E	Li et at., 2014, Table S9	Type 1
ENSG00000118137	-0.61	3.97e-11	APOA1	HPF	Assembly/Secretion	A	Mancone et al., 2011
ENSG00000109971	-0.59	1.3e-44	HSPA8	HPF	RNA Replication	R	Parent et al., 2009; Peng et al., 2010
ENSG00000109320	0.68	2.41e-27	NFKB1	HAF	RNA Replication	R	Li et at., 2014, Table S8
ENSG00000104312	0.79	1.27e-17	RIPK2	HAF	IRES-mediated Translation	T	Li et at., 2014, Table S8
ENSG00000080031	0.83	7.86e-22	PTPRH	HAF	RNA Replication	R	Li et at., 2014, Table S8
ENSG00000077150	1.29	4.42e-78	NFKB2	HAF	RNA Replication	R	Li et at., 2014, Table S8
ENSG00000104856	1.59	1.86e-84	RELB	HAF	RNA Replication	R	Li et at., 2014, Table S8
ENSG00000125347	1.6	2.52e-109	IRF1	HAF	RNA replication	R	Li et at., 2014, Table S9
ENSG00000184557	2.4	2.03e-123	SOCS3	HAF	RNA replication	R	Li et at., 2014, Table S9
ENSG00000263528	0.71	3.85e-10	IKBKE	HAF	RNA replication	R	Vilasco et at.,2009
ENSG00000114127	0.72	1.02e-15	XRN1	HAF	RNA replication	R	Li et at., 2013
ENSG00000102786	0.84	3.34e-19	INTS6	HPF	RNA Replication	R	Li et at., 2014, Table S8	Type 2
ENSG00000006062	0.96	3.26e-16	MAP3K14	HPF	Assembly/Secretion	A	Li et at., 2014, Table S8
ENSG00000125089	0.98	7.18e-44	SH3TC1	HPF	Assembly/Secretion	A	Li et at., 2014, Table S8
ENSG00000163545	1.82	8.36e-84	NUAK2	HPF	Assembly/Secretion	A	Goto et at., 2013
ENSG00000105499	2.91	8.27e-120	PLA2G4C	HPF	RNA replication; Assembly	M	Li et at., 2014, Table S9
ENSG00000170345	3.05	6.29e-100	FOS	HPF	RNA replication	R	Li et at., 2014, Table S9
The differentially expressed host factors at 60 h
	log2FC	FDR	Gene symbol	Function	Relavant HCV Life Cycle Stages	Abbreviation	References	Regulatory mode
ENSG00000185000	-0.61	1.35e-09	DGAT1	HPF	RNA Replication	R	Li et at., 2014, Table S8	Type 1
ENSG00000186951	-0.63	2.72e-10	PPARA	HPF	RNA Replication	R	Li et at., 2014, Table S9
ENSG00000138823	-0.64	2.88e-10	MTTP	HPF	Assembly/Maturation	A	Li et at., 2014, Table S9
ENSG00000109971	-0.65	6.77e-15	HSPA8	HPF	RNA Replication	R	Parent et al., 2009; Peng et al., 2010
ENSG00000196262	-0.65	3.96e-09	PPIA	HPF	RNA replication	R	Li et at., 2014, Table S9
ENSG00000169710	-0.69	1.77e-16	FASN	HPF	Entry; RNA replication	M	Li et at., 2014, Table S9
ENSG00000130208	-0.75	3.39e-12	APOC1	HPF	Morphogenesis	R	Li et at., 2014, Table S9
ENSG00000115884	-0.79	2.85e-11	SDC1	HPF	Attachment	E	Li et at., 2014, Table S9
ENSG00000116133	-0.81	4.25e-15	DHCR24	HPF	RNA Replication	R	Takano et al., 2011
ENSG00000120885	-0.85	2.5e-08	CLU	HPF	Assembly/Secretion	A	Lin et al., 2014
ENSG00000174827	-0.95	6.87e-10	PDZK1	HPF	Entry	E	Eyre et al., 2010
ENSG00000099194	-0.96	1.2e-23	SCD	HPF	RNA Replication	R	Nguyen et al., 2014
ENSG00000138207	-1.1	3.66e-21	RBP4	HPF	Entry; RNA Replication	M	Li et at., 2014, Table S8
ENSG00000084674	-1.16	3.19e-27	APOB	HPF	Assembly/Maturation	A	Li et at., 2014, Table S9
ENSG00000118137	-1.69	1.04e-27	APOA1	HPF	Assembly/Secretion	A	Mancone et al., 2011
ENSG00000114127	0.94	8.93e-08	XRN1	HAF	RNA replication	R	Li et at., 2013
ENSG00000263528	0.77	2.94e-06	IKBKE	HAF	RNA replication	R	Li et at., 2014, Table S8
ENSG00000104856	2.32	4.25e-61	RELB	HAF	RNA Replication	R	Li et at., 2014, Table S8
ENSG00000184557	2.2	1.68e-37	SOCS3	HAF	RNA replication	R	Li et at., 2014, Table S9
ENSG00000125347	1.71	6.23e-35	IRF1	HAF	RNA replication	R	Li et at., 2014, Table S9
ENSG00000077150	1.68	1.13e-44	NFKB2	HAF	RNA Replication	R	Li et at., 2014, Table S8
ENSG00000080031	1.32	1.26e-16	PTPRH	HAF	RNA Replication	R	Li et at., 2014, Table S8
ENSG00000104312	1.26	4.34e-12	RIPK2	HAF	IRES-mediated Translation	T	Li et at., 2014, Table S8
ENSG00000184304	1.02	9.87e-10	PRKD1	HAF	Secretion	A	Li et at., 2014, Table S9
ENSG00000172183	0.95	2.04e-07	ISG20	HAF	RNA replication	R	Li et at., 2014, Table S9
ENSG00000105499	4.67	6.19e-121	PLA2G4C	HPF	RNA replication; Assembly	M	Li et at., 2014, Table S9	Type 2
ENSG00000163545	3.05	1.45e-77	NUAK2	HPF	Assembly/Secretion	A	Li et at., 2014, Table S8
ENSG00000125089	1.59	1.2e-25	SH3TC1	HPF	Assembly/Secretion	A	Li et at., 2014, Table S8
ENSG00000006062	1.17	9.3e-08	MAP3K14	HPF	Assembly/Secretion	A	Li et at., 2014, Table S8
ENSG00000082014	1.14	5.27e-21	SMARCD3	HPF	Assembly/Secretion	A	Li et at., 2014, Table S8
ENSG00000197822	1.05	3.62e-16	OCLN	HPF	Entry	E	Li et at., 2014, Table S9
ENSG00000102786	0.86	9.2e-07	INTS6	HPF	RNA Replication	R	Li et at., 2014, Table S8
ENSG00000145391	0.82	7.13e-08	SETD7	HPF	RNA Replication	R	Han et al., 2015
ENSG00000110066	0.82	5.6e-10	SUV420H1	HPF	Assembly/Secretion	A	Li et at., 2014, Table S8
ENSG00000169174	-1.24	3.81e-24	PCSK9	HAF	Entry	E	Li et at., 2014, Table S9
HAF: host antiviral factors
HPF: host proviral factors
