# Supplementary material for: Transcriptome and miRNome Analysis Provide New Insight Into Host Lipid Accumulation, Innate Immunity, and Viral Persistence in Hepatitis C Virus Infection in vitro
Source: Front Microbiol. 2020 Sep 30;11:535673. doi: 10.3389/fmicb.2020.535673 (PMC7555709; doi:10.3389/fmicb.2020.535673)
Supplement: Supplementary Table 6 — The differentially expressed (DE) interferon-stimulated genes (ISGs) in HCV-infected Huh7 cells at 12, 36, and 60 h. [file Table_6.XLS]

## Sheet: DE ISGs at 12, 36 and 60 h
Supplementary Table S6. The differentially expressed (DE) interferon-stimulated genes(ISGs) in HCV-infected Huh7 cells at 12, 36 and 60 h
The differentially expressed interferon-stimulated genes at 12 h
	log2FC	FDR	Gene symbol
ENSG00000146278	0.65	0.000188342	PNRC1
ENSG00000169245	1.08	5.44e-07	CXCL10
The differentially expressed interferon-stimulated genes at 36 h
	log2FC	FDR	Gene symbol
ENSG00000006062	0.96	3.26e-16	MAP3K14
ENSG00000020577	1.08	4.71e-76	SAMD4A
ENSG00000059758	0.86	3.14e-20	CDK17
ENSG00000069399	0.99	1.23e-32	BCL3
ENSG00000096968	0.71	1.55e-07	JAK2
ENSG00000104312	0.79	1.27e-17	RIPK2
ENSG00000118503	2.12	5.21e-273	TNFAIP3
ENSG00000120833	1.6	1.63e-80	SOCS2
ENSG00000125347	1.6	2.52e-109	IRF1
ENSG00000135111	1.21	2.86e-90	TBX3
ENSG00000138061	1.57	3.17e-62	CYP1B1
ENSG00000144655	1.7	1.1e-74	CSRNP1
ENSG00000146278	1.01	2.05e-49	PNRC1
ENSG00000151726	0.9	6.47e-34	ACSL1
ENSG00000156232	1.35	1.82e-71	WHAMM
ENSG00000162772	3.62	0	ATF3
ENSG00000163121	3.39	3.06e-187	NEURL3
ENSG00000163251	0.69	3.38e-25	FZD5
ENSG00000163644	0.77	2.11e-18	PPM1K
ENSG00000165030	1.1	1.26e-53	NFIL3
ENSG00000165507	1.82	1.51e-40	C10orf10
ENSG00000168209	3.38	4.83e-168	DDIT4
ENSG00000168297	0.75	1.93e-09	PXK
ENSG00000170542	0.8	2.85e-26	SERPINB9
ENSG00000171223	1.98	1.46e-152	JUNB
ENSG00000172432	0.83	1.76e-18	GTPBP2
ENSG00000173210	0.85	7.62e-12	ABLIM3
ENSG00000185022	1.9	1.7e-90	MAFF
ENSG00000198355	0.96	2.65e-35	PIM3
ENSG00000265972	1.83	4.44e-146	TXNIP
The differentially expressed interferon-stimulated genes at 60 h
	log2FC	FDR	Gene symbol
ENSG00000162772	5.19	3.28e-258	ATF3
ENSG00000163121	4.87	1.03e-102	NEURL3
ENSG00000117020	4.33	1.4e-70	AKT3
ENSG00000120833	3.34	5.38e-98	SOCS2
ENSG00000138061	2.53	5.87e-30	CYP1B1
ENSG00000185022	2.46	2.29e-61	MAFF
ENSG00000168209	2.19	6.95e-25	DDIT4
ENSG00000118503	2.04	1.97e-51	TNFAIP3
ENSG00000156232	1.94	8.12e-52	WHAMM
ENSG00000144655	1.87	1.26e-48	CSRNP1
ENSG00000020577	1.85	7.08e-43	SAMD4A
ENSG00000171223	1.74	3.87e-34	JUNB
ENSG00000125347	1.71	6.23e-35	IRF1
ENSG00000198355	1.69	4.84e-30	PIM3
ENSG00000138119	1.65	4.95e-35	MYOF
ENSG00000110090	1.65	3.25e-28	CPT1A
ENSG00000163251	1.54	4.66e-35	FZD5
ENSG00000170542	1.41	2.65e-23	SERPINB9
ENSG00000172432	1.31	1.45e-15	GTPBP2
ENSG00000164136	1.3	2.13e-07	IL15
ENSG00000104312	1.26	4.34e-12	RIPK2
ENSG00000165507	1.24	2.46e-08	C10orf10
ENSG00000123240	1.21	2.31e-20	OPTN
ENSG00000006062	1.17	9.3e-08	MAP3K14
ENSG00000265972	1.14	7.98e-12	TXNIP
ENSG00000188290	1.1	7.49e-11	HES4
ENSG00000173210	1.06	1.54e-12	ABLIM3
ENSG00000168297	0.99	1.88e-07	PXK
ENSG00000151726	0.96	1.06e-11	ACSL1
ENSG00000116514	0.95	3.23e-08	RNF19B
ENSG00000105835	0.95	1.7e-11	NAMPT
ENSG00000172183	0.95	2.04e-07	ISG20
ENSG00000130589	0.93	8.49e-06	HELZ2
ENSG00000059758	0.9	6.22e-10	CDK17
ENSG00000146859	0.89	1.7e-09	TMEM140
ENSG00000107201	0.89	1.1e-06	DDX58
ENSG00000163644	0.83	0.000521707	PPM1K
ENSG00000185436	0.82	0.000170516	IFNLR1
ENSG00000103966	0.78	1.85e-08	EHD4
ENSG00000165030	0.74	8.68e-08	NFIL3
ENSG00000198053	-0.61	6.34e-12	SIRPA
ENSG00000060566	-0.66	5.77e-06	CREB3L3
ENSG00000171236	-0.68	7.53e-14	LRG1
ENSG00000145246	-0.71	1.13e-08	ATP10D
ENSG00000165092	-0.72	6.34e-08	ALDH1A1
ENSG00000107798	-0.93	3.38e-18	LIPA
ENSG00000169245	-0.98	2.91e-12	CXCL10
ENSG00000149131	-1.37	3.83e-11	SERPING1
ENSG00000004468	-1.61	9.12e-41	CD38
