# Supplementary material for: Transcriptome and miRNome Analysis Provide New Insight Into Host Lipid Accumulation, Innate Immunity, and Viral Persistence in Hepatitis C Virus Infection in vitro
Source: Front Microbiol. 2020 Sep 30;11:535673. doi: 10.3389/fmicb.2020.535673 (PMC7555709; doi:10.3389/fmicb.2020.535673)
Supplement: Supplementary Table 8 — Predicted targets regulated by 38 differentially expressed (DE) miRNA at 60 h. [file Table_8.XLS]

## Sheet: DE miRNA and their targets
Supplementary Table S8. Predicted targets regulated by 38 differentially expressed (DE) miRNAs at 60 h
DE miRNA	Predicted targets
miR-10b-5pa	APOC3, DGAT1, FASN, H6PD, IGSF1, METTL7A, PPARA, SDC1, TCF19, TFPI, TUBA1B
miR-1246	ACSL4, AGMO, AKR1C2, ALDH6A1, ALDH7A1, ATOX1, ATP2B2, BTD, C11orf54, C2orf72, CA2, CALU, CPM, CYP4F3, DUSP9, FOXG1, GSTK1, GYG2, HAL, IGF2, INSIG1, KIAA1217, KIF20A, KLF2, LIPG, MAN1A1, METTL7A, MGST3, MSRB1, NIPAL1, NT5E, PBX1, PCDHB5, PGPEP1, PLCXD1, PON2, PPARA, PRLR, SCD, SCP2, SERPIND1, SKP2, SLC16A10, SLC25A1, SLCO4C1, SNRPD3, SPTLC3, STEAP2, TCEA3, TTR, UBE2L3, UGT2B4, ZNF512
miR-1260a	ABCA1, ACADSB, ADH5, ADI1, AGFG2, ALDH6A1, ALDH7A1, AMN, ANXA6, APOA1, ARHGAP33, ASGR2, ATP2B2, BCAM, BSG, BTD, C11orf54, C17orf89, C21orf58, CALU, CCDC69, CD38, CHST13, CLU, CSF3R, CYP27A1, CYP4F3, DBI, DHCR24, F2, FASN, FGG, GLYCTK, GM2A, GMDS, GPAM, GPER1, H2AFX, H6PD, HADH, HAS2, HMGA2, HPX, IGF2, IGFBP4, ITGAL, KIAA1161, KIAA1217, KLF2, LHPP, LIPC, LOX, MAP2K6, MGST3, MMP15, MPV17L, MSRB1, N…
miR-1260b	C1orf115, CTSO, DHCR24, EPHX2, F2, IDH2, KIAA1161, MGST3, MSMO1, PXMP4, RPS15, SCD, SCP2, SMOC1, TCF19
miR-132-3p	ACSL4, C1orf115, CALU, DUSP9, NDUFB10, NREP, SFXN2, STMN1, TFPI
miR-181a-3p	AGT, ALDH6A1, ANPEP, ATP2B2, CENPM, CPS1, FAM101B, FAM114A1, GM2A, GYG2, KANK4, MGMT, SPTLC3, TCF19
miR-181b-3p	CENPM, COX6B1, DHCR24, FAM101B, GINS2
miR-181c-3p	BTD, CD302, CD38, CLU, COX6B1, CPS1, DGAT1, GINS2, GM2A, GSTA4, GYG2, LRRC3, MAOB, NREP, OAF, PCSK9, PEBP1, PEG10, PPARA, PRLR, RPL23, SCP2, SPTLC3, TCEA3
miR-181c-5p	HMGA2, NREP, PBX1, PEBP1, SCD, SPTLC3
miR-19a-5p	ABCA1, ADH5, ADH6, AGTR1, APOB, ATP10D, BTD, CD38, CP, CPM, CPN1, CYB5A, DHCR24, F2, FAM101B, GATM, GPAM, HIST1H4I, HMGA2, IGFBP4, INSIG1, KIAA1161, KIAA1217, LIPG, LOX, LRG1, MAN1A1, MAP2K6, METTL7A, MGST3, MPV17L, NIPAL1, NIPSNAP1, NTS, OAF, PCSK9, PEG10, PGPEP1, RPS24, RRM2, SDC1, SEMA4G, SLC16A10, SLCO4C1, SOAT2, SPTLC3, ST3GAL1, TOMM40L, TTR, TXNDC5, UGT2B4, VSNL1
miR-21-3p	APOC3, ATP2B2, C11orf54, CALU, CENPM, CPM, CPN1, DUSP9, FAM101B, FASN, GM2A, GPAM, H2AFX, HAL, LIPG, MBL2, PAH, PCDHB5, PCOLCE2, PPARA, PRLR, PTGDR2, PVRL1, PXMP4, RPS24, SEMA4G, SNRPD2, SUMO3, TMEM141, TTR, UBE2L3
miR-21-5p	CCL20, CLU, CXCL10, FOXG1, GPAM, LANCL1, NIPAL1, PBX1, PPARA, SKP2, SLC16A10, SPTLC3, ST6GAL1
miR-23a-5p	ATOX1, C11orf54, CYB5A, HAS2, KLF2, LRRC45, PXMP4, SARDH, SERPING1, VWA1
miR-25-5p	AGMAT, ALDH6A1, BCAM, BTD, C11orf54, C14orf2, C21orf58, CD302, CLU, COX6B1, CPM, CYP4F3, DHFR, F2, FAM114A1, FGFR4, GM2A, H6PD, INSIG1, KIAA1161, LHPP, LIPG, LRRC3, MMP15, MPV17L, PCDHB5, PLCXD1, PPIA, PVRL1, RBP4, RPL23, RPS27L, SDC1, SERPING1, SKP2, SLC16A10, SLC25A1, SLC6A11, SNRPD3, TMEM97, VWA1
miR-26a-2-3p	MAOB, RPL24, SERPINA4, SLC16A10
miR-27a-3p	ABCA1, AHSG, DPYD, FASN, GPAM, HAS2, LOX, MAP2K6, OAF, PEG10, RPS24, SFXN2, SLC16A10, TFPI, TOMM40L, TXNDC5
miR-27a-5p	AADAC, ABCA1, AGFG2, AKR1C2, ANPEP, ANXA6, APOB, APOC3, ATP2B2, BCAM, C21orf58, CD302, CENPM, CPN2, CSF3R, CYB5A, EPHX2, FOXG1, GINS2, GM2A, GPAM, GSTK1, H6PD, HTRA3, IGF2, ITPKA, KLF2, LIPG, LRRC3, MAOB, MMP15, MPV17L, NME4, NREP, NT5E, PAH, PBX1, PCSK9, PON2, PPARA, PRLR, PROCA1, PVRL1, PXMP4, RPS24, SARDH, SEMA4G, SERPINA1, SERPINA4, SERPING1, SKP2, SLC13A5, SLC16A10, SLC25A23, SLC47A1, SLCO4C…
miR-27b-5p	AGFG2, ATP2B2, BTD, C21orf58, C2orf72, CALU, CD38, CLU, COX6B1, CPN2, CRYZ, CXCL10, DGAT1, DHCR24, DPYD, EPHX1, EPHX2, F2, FABP5, FAM101B, FAM114A1, FAM162A, FGB, GINS2, GPAM, HAL, IGF2, IGFBP4, KLF2, LANCL1, LIPG, MEP1A, MGST3, NT5E, PCSK9, PRLR, RPL23, SARDH, SCD, SEMA3D, SERPINA4, SERPINA5, SERPIND1, SLC16A10, SLC25A23, SLCO2B1, ST3GAL1, TMEM141, TXNDC5, UBE2L3, UGT2B4
miR-30a-3p	ABCA1, ADH5, AFP, AGMO, AKR1C2, ALB, ALDH7A1, ANXA6, APOB, APOC3, ARPC1A, ATP10D, ATP2B2, BTD, C21orf58, C2orf72, CD302, CD38, CLU, CP, CPS1, CTSO, CXCL10, CYB5A, DDC, DHCR24, DHFR, FAM101B, FAM114A1, FAM162A, FOXG1, GLUD1, GLYCTK, GM2A, GMDS, GPER1, HADH, HMGA2, INSIG1, KANK4, KIF20A, LIPG, LOX, LRRC3, MAP2K6, MBL2, METTL7A, MGMT, MGST1, NREP, OAF, PCDHB5, PCDHGA10, PEBP1, PEG10, PGPEP1, PON2, P…
miR-30c-1-3p	APOB, APOC3, BCAM, CENPW, CLU, COX6B1, CPM, CPS1, DGAT2, EPHX2, F2, FGFR4, FGG, GMDS, HAS2, HMGN3, INSIG1, KLF2, LRG1, MAN1A1, MBL2, METTL7B, NDUFS5, PBX1, PCDHB5, PGPEP1, PIGZ, PON2, PPARA, PPIA, RBP4, RPS24, RPS27L, SIRPA, SLC13A5, SLC16A10, SLC29A4, SNRPD3, SPTLC3, ST6GAL1, TPI1, TTR, UGT2B4, VASN, VWA1
miR-30e-3p	AADAC, ACSL4, BTD, CALU, GPAM, SCP2, SLC16A10, STMN1, TFPI
miR-424-3p	ADH5, ADH6, AKR1C2, C14orf2, C21orf58, CALU, CENPW, CYP4F3, FAM101B, FAM162A, FGFR4, FOXG1, GINS2, GLUD1, GM2A, GPAM, H6PD, HIST1H4I, HMGA2, IDH2, LIPA, LRP1, MAP2K6, MSMO1, NIPAL1, NREP, OAF, PBX1, PEG10, PLCXD1, RRM2, SCD, SLC16A10, SMOC1, SPTLC3, ST6GAL1
miR-449a	PEG10, VASN
miR-449b-5p	MYCN, PEG10, PGM1, SERPINF2, VASN
miR-449c-5p	APOC3, C11orf54, C14orf2, C2orf72, CCDC69, COX6B1, CPM, FAM114A1, GM2A, GSTK1, HABP2, HMGN3, HTRA3, ITGAL, LYZ, MARCKSL1, MPV17L, NIPSNAP1, PCSK9, PTPN18, PXMP4, SARDH, SERPINA4, SIRPA, SUMO3, TF, UBE2L3, VASN, WNK4
miR-4792	ABCA2, AGMO, ALDH6A1, AMN, ATP2B2, BSG, BTD, C21orf58, C2orf72, CALU, CD302, CD38, CENPM, COX6B1, CPM, CSF3R, DBI, DHCR24, EFCAB11, EPHX1, EPHX2, FASN, FGB, GM2A, GPAM, GPER1, GYG2, H6PD, HABP2, INSIG1, ITPKA, KIAA1217, KLF2, LDOC1, LHPP, LIPG, MMP15, NUP210, ORM2, PBX1, PLCXD1, PPARA, PRLR, PTPN18, PXMP4, RBP4, RPL24, SARDH, SEMA3D, SERPINA4, SIRPA, SLC13A5, SLC16A10, SLC25A23, SLC29A4, SLC47A1,…
miR-486-5p	SMOC1
miR-550a-3p	ABCA1, ALDH6A1, ATOX1, C2orf72, CPM, CXCL10, CYP4F3, DHFR, GM2A, IGF2, KIAA1161, LOX, MBL2, PPARA, PRLR, PXMP4, RPL24, SEMA4G, SLC13A5, SMLR1, SULT2A1, ZNF512
miR-625-5p	ABCA2, ACADSB, AFMID, AGFG2, AGMAT, AGMO, AGPAT2, AGT, AMN, ANXA6, ATP2B2, BCAM, BTD, C14orf2, C1orf115, C20orf27, C2orf72, C8orf82, CALR, CALU, CD38, CENPM, CENPW, CETN2, CLU, CNIH2, CPM, CPS1, CRYZ, CSF3R, DGAT1, DHFR, DUSP9, DYNLRB1, EPHX2, F12, FADS2, FAM114A1, FASN, FGB, GAPDH, GINS2, GJB1, GLYCTK, GMDS, GSTK1, H6PD, HABP2, HAL, HIST1H2BC, HIST1H2BK, HMGCS2, HPX, HTRA3, IGF2, IGFBP4, IGSF1, …
miR-92a-1-5p	ABCA2, ACADSB, ACSL4, ADH5, AKR1C2, ALDH6A1, ARHGAP33, ATP2B2, C11orf54, CALR, CD38, CNIH2, CPN2, CTNNBIP1, DGAT2, DHCR24, EPHX1, EPHX2, F2, GCKR, GINS2, GLYCTK, GPAM, GSDMB, GSTK1, HMGA2, HPX, IGFBP4, KLF2, KNG1, LHPP, LIPG, LRRC3, MAP2K6, METTL7B, MPZL2, NGEF, NIPSNAP1, NUP210, OAF, PBX1, PCDHGA10, PEG10, PPARA, PPP1R14B, PRLR, PTPN18, PVRL1, RRBP1, SCD, SEMA3D, SEMA4G, SERPINA4, SLC16A10, SLC2…
miR-122-5pb	TFE3, SLC38A9, KCMF1, SPECC1, ACVR1C, WWC1, MEF2D, SLC12A6, HSPA4L, OTUD7B, SATB1, REL, RNF19B, DMXL1, ORAI2, TBC1D22B, ZNF264, OCLN, SLC7A5, MOSPD1, SERAC1, PFKFB2, CLK4, ATP6V1H, USP53, SLC1A5, DUSP4, DSTYK, OPTN, H1F0, CSRP1, SLC9A1, FHL2, F2RL1, MYO9A, SESN2, SLC7A1, RAB6B, PLEKHM3, FOXO3, RRAGC, CCRN4L, LCA5, FSTL3, BACH2, MOB3B, MAFF, SLC7A11, MAFK, ADM2, BHLHE41, AKT3, BEST1
miR-1303	ACOX3, ACSL1, ACSL5, ACVR1, ADNP2, AGO4, AHCYL2, ALKBH1, ANK3, ANKLE2, ANKRD1, ANKRD6, APLF, ARHGAP26, ARHGAP29, ATG2B, BACH1, BMF, BMP2, BTBD9, C10orf12, C12orf49, C16orf87, C20orf194, C8orf4, CCDC174, CCDC93, CDC14A, CDK6, CDKN2B, CDYL2, CEP57, CHN1, CLIP4, CNNM2, COL11A2, CPEB2, CPNE8, CPT1A, CREBRF, CRIM1, CSPP1, CSRNP1, CTH, CTIF, CYR61, DAAM1, DENND4A, DIAPH3, DMRTA1, DNAH14, DOCK11, DYRK1A…
miR-194-3p	ACSL5, AHR, AKNA, ALDH1L2, ALPK2, ANKRD33B, ANKRD6, AP4E1, AP5Z1, ARHGAP26, ARHGAP29, ARHGEF2, ARID5B, ASB7, ATG2B, ATXN2L, BACH1, BCL10, BHLHA15, BMF, BMP8B, BRD1, BTBD9, C10orf10, C10orf54, C19orf26, C20orf194, CAV1, CCDC93, CD55, CDC42EP2, CDKN2AIP, CDR2L, CEP57, CEP68, CHAC1, CHD2, CNNM2, COL11A2, COL7A1, CPT1A, CREB3L1, CREB5, CREBRF, CSF1, CSGALNACT2, CSRNP1, CTIF, CTNS, DLC1, DLX2, DMRTA1,…
miR-3187-3p	ABLIM3, ABRACL, AGO4, AHCYL2, AKAP12, AKNA, ALKBH1, ALPK2, AMOTL1, ANK3, ANKRD33B, ANKRD42, AP5Z1, ARHGAP29, ARID5B, BACH1, BBC3, BHLHA15, BIRC3, BMP2, BMP8B, BRAP, BTBD9, C10orf54, C16orf87, C20orf194, C9orf156, CAV1, CCDC174, CCDC93, CD55, CDK6, CEBPG, CEP68, CHIC2, CHST15, CLIP1, CNOT10, CPEB2, CRIM1, CRIP2, CSRNP1, CTH, CTIF, CTTNBP2NL, CXCL2, CYLD, CYR61, CYTH3, DAAM1, DAB2IP, DDR1, DDX60L, …
miR-4454	AGO4, ARHGAP26, ARHGAP29, ATG14, CCDC174, CCNB1IP1, CPT1A, CTH, DOCK11, FOXO1, GDPD1, H2AFJ, IRF1, ITPRIPL2, KLHL24, KLHL5, LETM2, LONRF3, MAP3K9, MAPK13, NBEAL1, NT5C2, OSBPL6, PDLIM3, PROSER2, RAB11FIP4, RAB3IL1, RDH13, RNF115, RSPH3, SAMD4A, SHC2, SLC43A2, SMCR8, SNAPC1, TNFAIP8, TSC22D2, TTC26, TYW1B, WWC3, XRN1, ZBTB25, ZC3H6, ZFP30, ZNF557, ZNF581, ZNF791, ZNF805, ZNF844, ZNF85, SLC38A9, SL…
miR-483-5p	ACHE, ACOX3, AHR, ANKRD6, ARHGAP26, ARHGAP29, BTBD9, C20orf194, CCDC93, CCNB1IP1, CDR2L, CHST15, CLIP4, CPT1A, CREBRF, CXXC5, DLX2, DUSP1, ERCC4, FAM212B, FGF2, FOSL2, FOXJ2, FOXO1, GDPD1, GMEB2, HCFC2, HCN4, HELZ2, IER2, INPP5E, IPPK, IRF1, KIAA0513, KIAA1244, KLF7, KLF9, KLHL5, MAP1LC3B, MAP3K9, MAP7D3, MSANTD3, MTHFR, NAPB, NAV2, NCR3LG1, ORAOV1, PACS1, PAWR, PQLC2, PTPN14, RAB3IL1, RASSF9, RD…
miR-671-5p	ABLIM3, ABRACL, AFF4, AGO4, AKAP12, AMOTL1, ANK3, ANKRD33B, ANKRD42, AP5Z1, ARHGEF2, ARID5B, ATAD2B, ATG14, ATG2B, ATXN7, BHLHA15, BMF, BMP2, BMP8B, BRD1, BTBD9, C10orf12, C10orf54, C12orf49, C16orf87, C17orf53, C19orf26, C20orf194, CAPN2, CARS, CBX4, CCDC174, CCDC93, CD55, CDK6, CDKN2AIP, CDKN2B, CDR2L, CDYL2, CEP57, CEP85L, CHD2, CHML, COL11A2, CPEB4, CREB5, CREBRF, CRIP2, CSF1, CSRNP1, CTIF, C…
miR-885-5p	ABLIM3, AFF4, AGO4, AHCYL2, AJUBA, AKAP12, AMMECR1L, ANKLE2, ANKRD33B, ANKRD6, AP4E1, AREG, ARHGEF40, ARMCX3, ARRDC4, ATAD2B, ATXN7, BBS7, BMF, BMP2, C10orf12, C12orf49, C16orf87, C9orf156, CCDC93, CD55, CDK17, CDK6, CDKN2B, CDYL2, CEBPG, CEP68, CEP85L, CHML, CLIP4, CNNM2, CPEB2, CPEB4, CYP1B1, DDX58, DIAPH3, DLC1, DNAJB5, DOCK11, DTNA, DYRK1A, ERCC4, EREG, ERO1LB, EXPH5, F2RL2, FAM179B, FAM47E-S…
a, upregulated miRNAs (red)
b, downregulated miRNAs (green)

## Sheet: miRNA targeted HFs ISGs and TFs
DE miRNAs and targeted HFs
Types of HFs	miRNAs
Assembly/Secretion(A)	miR-1260a, miR-181c-3p, miR-21-5p, miR-25-5p, miR-27b-5p, miR-1303
Entry(E)	miR-10b-5p, miR-25-5p, miR-122-5p, miR-885-5p
Multiple(M)	miR-1260a, miR-25-5p, miR-671-5p
Replication(R)	miR-1260a, miR-1260b, miR-181c-5p, miR-27b-5p, miR-671-5p
Translation(T)	miR-671-5p
DE miRNAs and targeted ISGs
miRNA	ISGs
miR-122-5p	RNF19B, OPTN, MAFF, AKT3
miR-1303	IFNLR1, PPM1K, PXK, ACSL1, SERPINB9, CPT1A, IRF1, JUNB, CSRNP1, RNF19B, AKT3
miR-483-5p	HELZ2, CPT1A, IRF1, RNF19B
miR-671-5p	EHD4, HELZ2, TMEM140, NAMPT, ISG20, ABLIM3, RIPK2, SAMD4A, DDIT4, SOCS2, IFNLR1, CSRNP1, RNF19B
miR-885-5p	CDK17, CYP1B1, DDX58, FZD5, IL15, TXNIP, TMEM140, ABLIM3, RNF19B
DE miRNAs and targeted TFs
miRNAs	TFs
miR-122-5p	TFE3, MEF2D, SATB1, REL, FHL2, FOXO3, BACH2, MAFF, MAFK, BHLHE41
miR-1303	FOXJ2, ELF1, BACH1, MXI1, THAP1, TEAD1, HLF, NR3C1, HOXA1, MXD1, SKIL, PAWR, GLIS3, SMAD9, IRF1, JUNB, KLF10, FOSL2, ANKRD1, MEF2D, REL, FHL2, FOXO3, BACH2
miR-483-5p	FOXO1, AHR, KLF9, KLF7, DLX2, FOXJ2, THAP1, TEAD1, PAWR, IRF1, FOSL2, REL, FHL2, FOXO3, MAFK
miR-671-5p	ELL, VEZF1, CHD2, GATA2, SMAD7, HNF1A, ARID5B, JDP2, MYC, ZNF274, HDAC5, MAFG, KLF6, PER1, CREB5, PPARGC1A, DLX2, MXI1, HOXA1, PAWR, GLIS3, SMAD9, KLF10, FOSL2, MEF2D, FOXO3, MAFK
miR-885-5p	KDM5B, CEBPG, SIX4, MYC, FOXO1, KLF7, MXI1, HOXA1, MXD1, SKIL, SMAD9, FOSL2, TFE3, REL, FHL2, BACH2, MAFK, BHLHE41
